# Supplementary material for: Cerebellar pathology in Friedreich's ataxia: Atrophied dentate nuclei with normal iron content
Source: PubMed Central journal article supplement — Neuroimage Clin. 2014 Aug 23;6:93–9. doi: 10.1016/j.nicl.2014.08.018 (PMC4215469; doi:10.1016/j.nicl.2014.08.018), 2014-08-23
Supplement: mmc1.pdf [file mmc1.pdf]

### Supplementary material: Late-onset FA

To exclude differences in the course of disease between patients with early and late-onset, we performed a *t*-test comparing both groups for all evaluated parameters. Dentate iron levels tended to be higher in early-onset compared to LOFA at 7 T ( $R^2$ , early-onset 80.6, late-onset 65.2,  $t(10) = 2.0$ ,  $p = 0.079$ ). The difference did not reach significance. No further differences were observed. Note that subgroups were small and statistical results need to be treated with caution.
